# Supplementary material
Source: publisher site journal article supplement (https://neobiota.pensoft.net/article/39260/download/suppl/33/)

Supplementary material C. – Box plots for selected six clusters with subjectively recognized urban types. F(5;168) and p-values are given for rural = 2.1739; p = 0.0593; old villas = 1.3758; p = 0.2358; family houses = 1.9561; p = 0.0877; **modern neighbourhoods = 14.9219; p = 0.0000**; **cemeteries = 2.3122; p = 0.0461; public greenery = 2.2985; p = 0.0473** and allotments = 1.9635; p = 0.0866. **Percentage of specialists** **in gardening** was significantly different among clusters (F=2.8638; p = 0.0165).


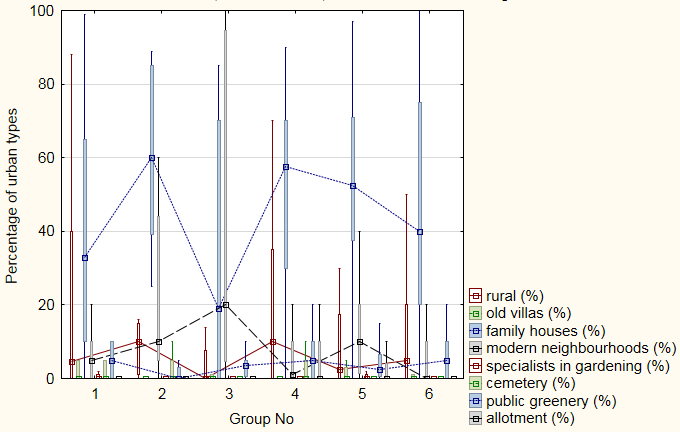

Supplement: Supplementary file 1
